# Supplementary material for: Identification of novel autoantibody signatures and evaluation of a panel of autoantibodies in breast cancer
Source: PubMed Central journal article supplement — Cancer Sci. 2021 Jul 4;112(8):3388–400. doi: 10.1111/cas.15021 (PMC8353906; doi:10.1111/cas.15021), 2021-07-04
Supplement: CAS-112-3388-s003.pdf [file CAS-112-3388-s003.pdf]

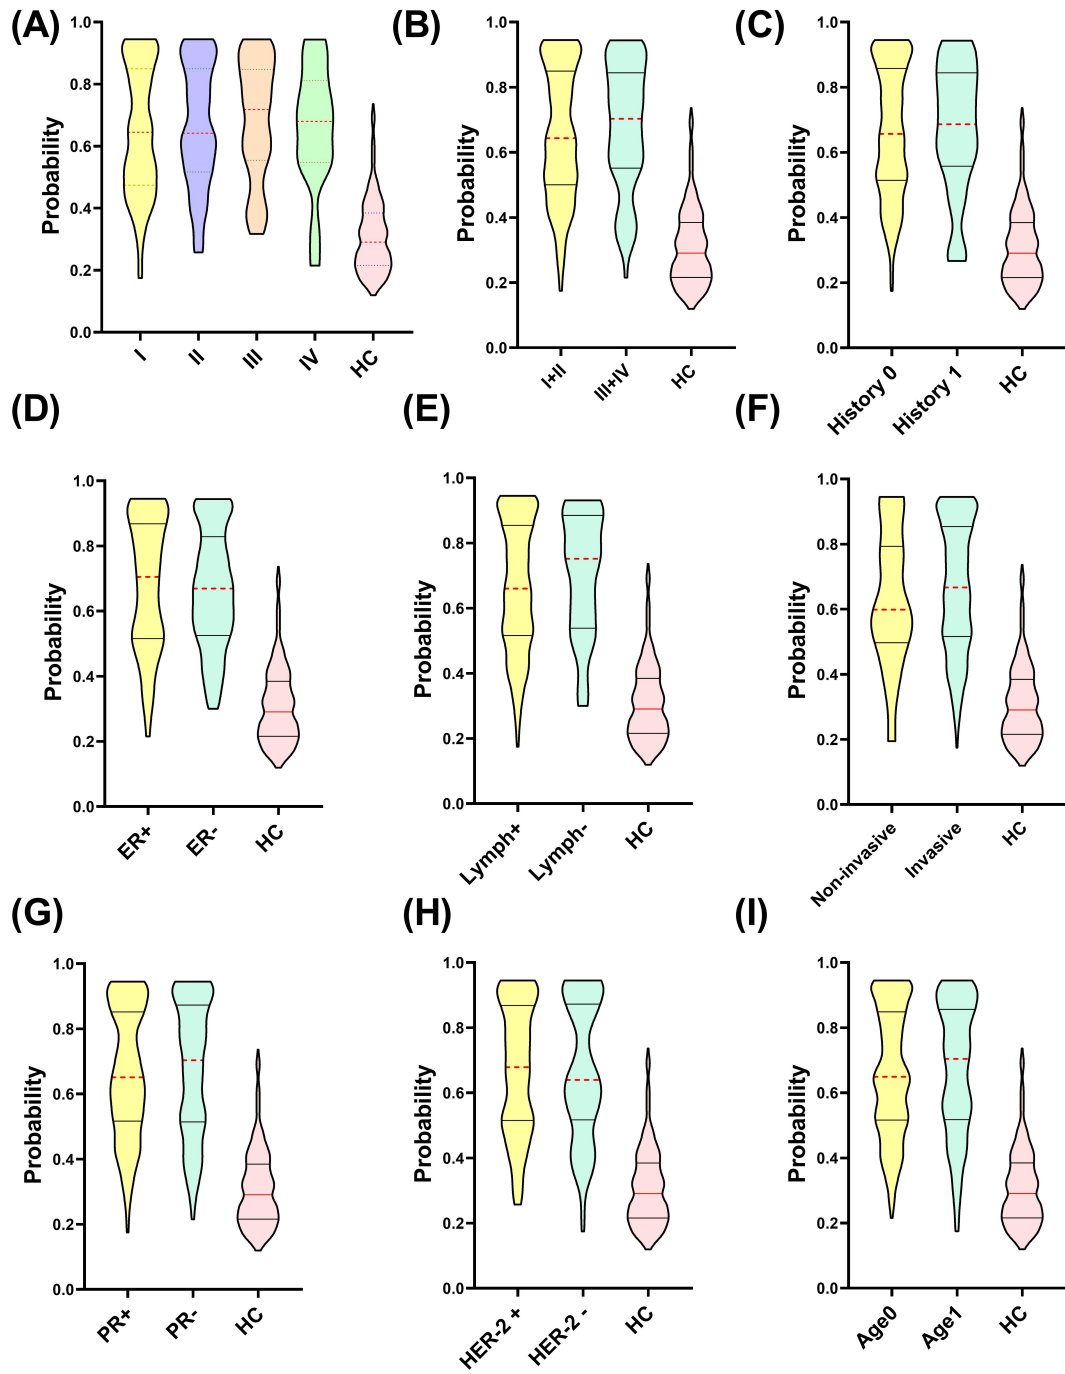

**Figure S5.** Distribution of predicted probability of the model with six TAABs among subgroups of BC patients based on tumor stage (A-B), family history of cancer (C), estrogen receptor, ER (D), lymph node metastasis (E), histological types (F), progesterone receptor, PR (G), human epidermal growth factor receptor 2, HER2 (H), and ages (I). Age 0, age < 50; Age 1, age  $\geq$  50. TAABs, tumor-associated autoantibodies.
