# Supplementary material for: Identification of novel autoantibody signatures and evaluation of a panel of autoantibodies in breast cancer
Source: PubMed Central journal article supplement — Cancer Sci. 2021 Jul 4;112(8):3388–400. doi: 10.1111/cas.15021 (PMC8353906; doi:10.1111/cas.15021), 2021-07-04
Supplement: CAS-112-3388-s007.pdf [file CAS-112-3388-s007.pdf]

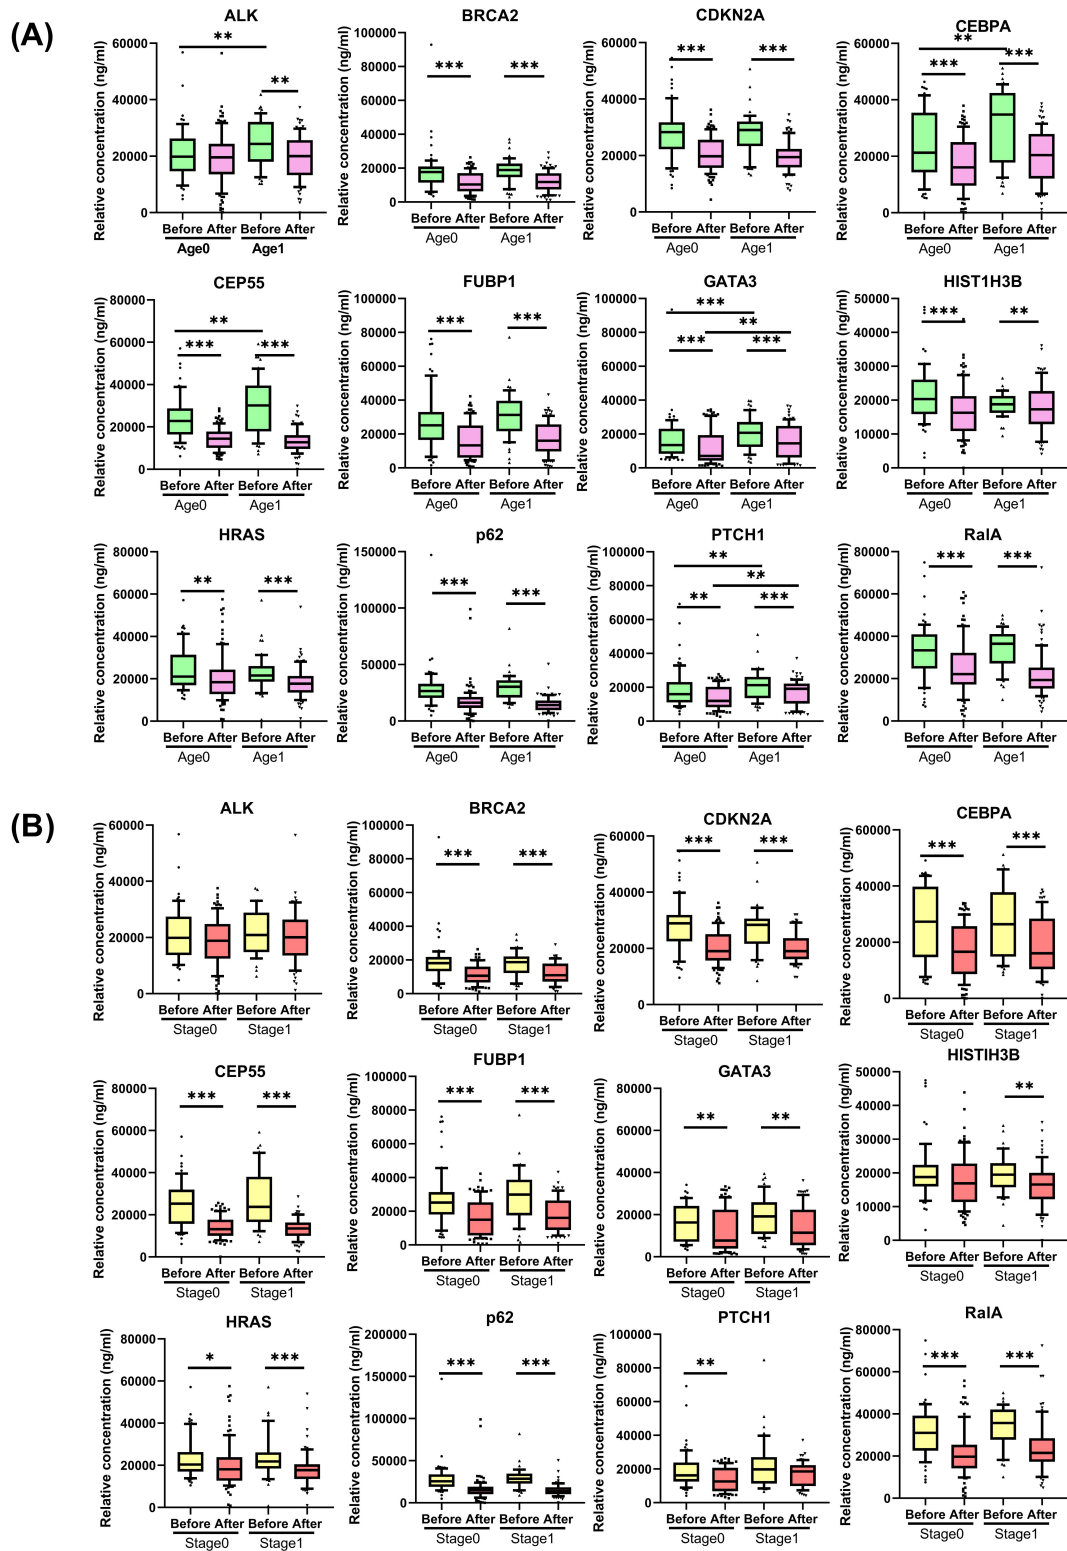

**Figure S4.** The expression of 12 TAAbs in different stages and ages from the preoperative and postoperative patients. Stage 0, early-stage (I+II); Stage 1, late-stage (II+IV); Age 0, age < 50; Age 1, age  $\geq$  50. TAAbs, tumor-associated autoantibodies.
