# Supplementary material for: Identification of novel autoantibody signatures and evaluation of a panel of autoantibodies in breast cancer
Source: PubMed Central journal article supplement — Cancer Sci. 2021 Jul 4;112(8):3388–400. doi: 10.1111/cas.15021 (PMC8353906; doi:10.1111/cas.15021), 2021-07-04
Supplement: CAS-112-3388-s008.pdf [file CAS-112-3388-s008.pdf]

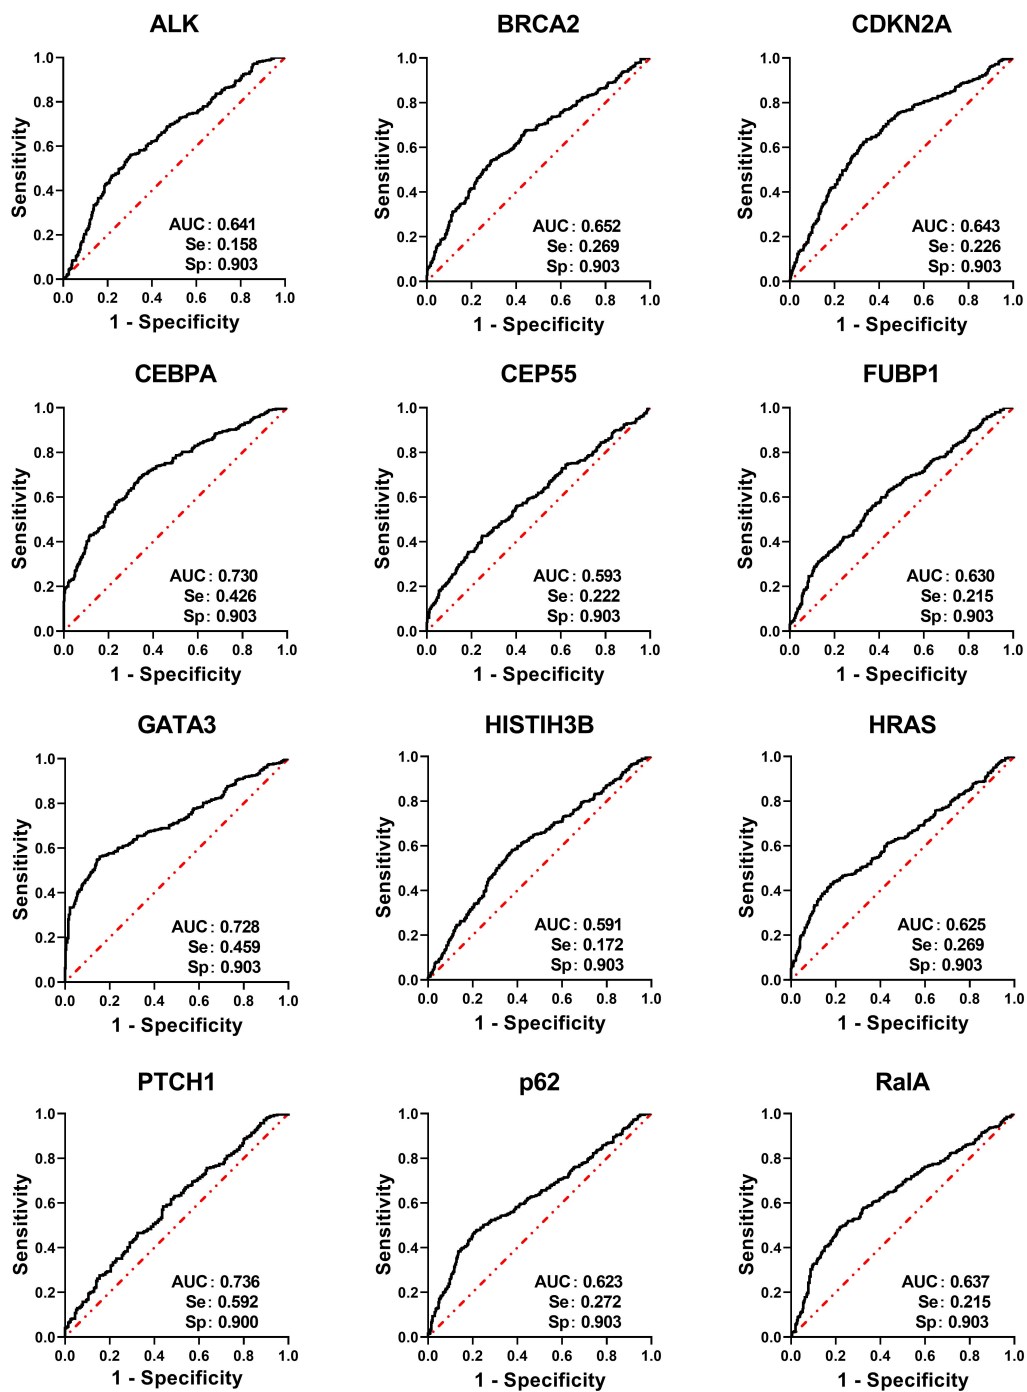

**Figure S2.** ROC curves of individual TAAbs detected by ELISA for identifying BC (N=120) from healthy controls (HC, N=120). TAAbs, tumor-associated autoantibodies.
